# Supplementary material
Source: PubMed Central journal article supplement (PMC3133150)

$P_{pknE-P-gfp}$

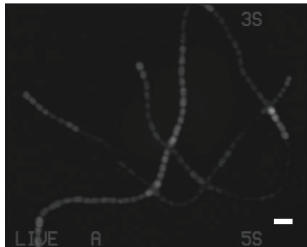

0 h

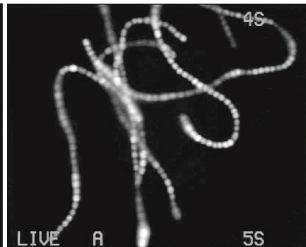

3 h

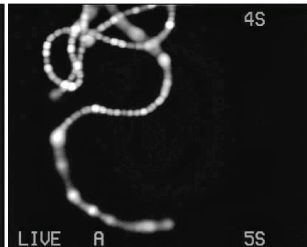

6 h

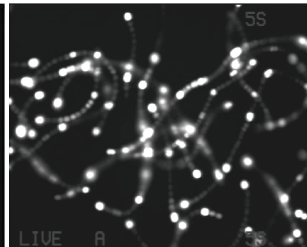

12 h

Supplement: supp_193_10_2619__1.pdf [file supp_193_10_2619__1.pdf]

$P_{pknE}$ -PmutntcA-*gfp*

$P_{pknE}$ -P2mutntcA-*gfp*

GFP & AF

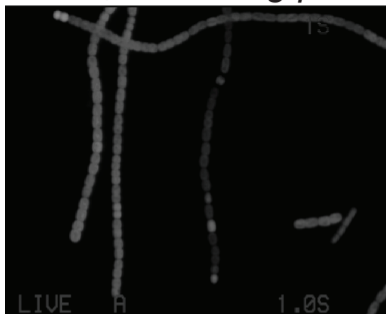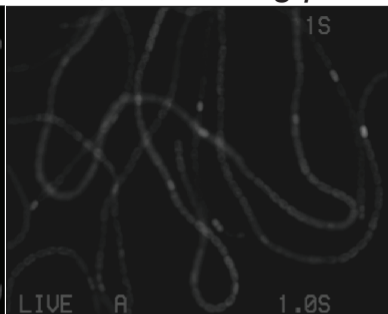

GFP

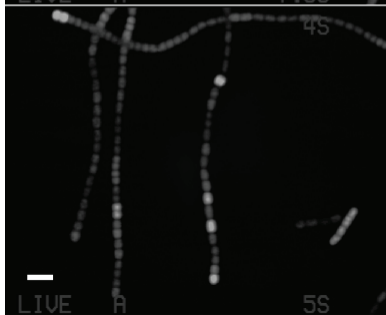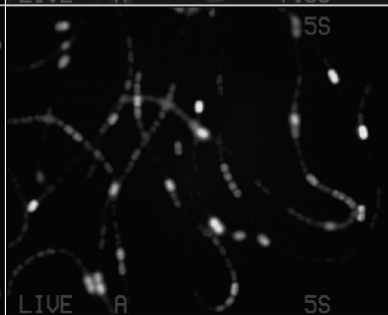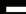

Supplement: supp_193_10_2619__2.pdf [file supp_193_10_2619__2.pdf]

$P_{pknE-P-gfp}$

GFP & AF

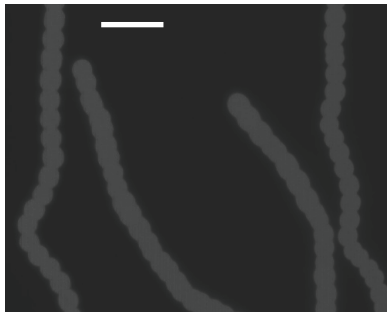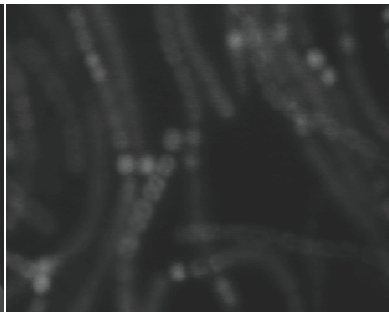

GFP

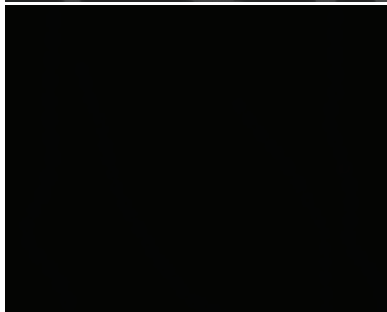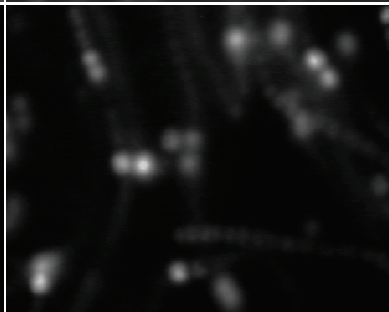

$\Delta hetR$

*extracopy hetR-6His*

Supplement: supp_193_10_2619__3.pdf [file supp_193_10_2619__3.pdf]

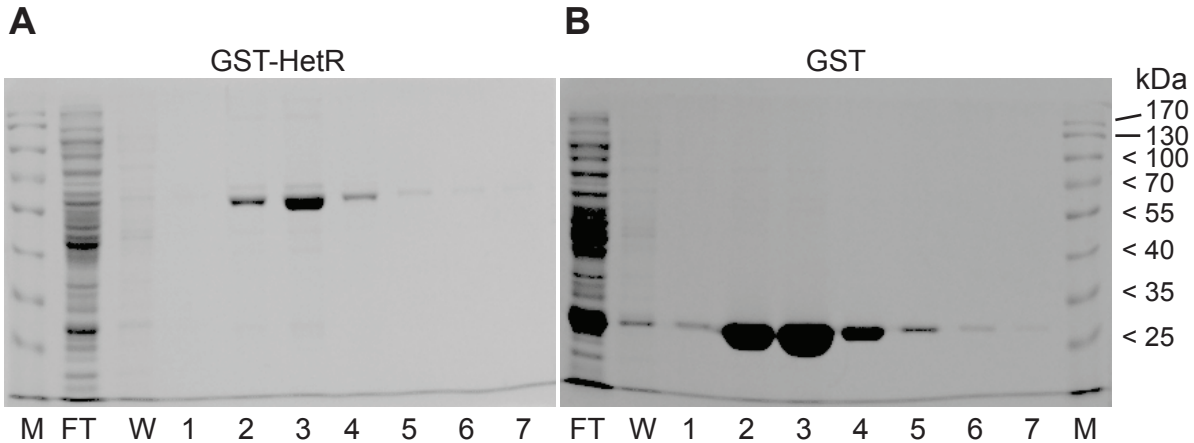

Supplement: supp_193_10_2619__4.pdf [file supp_193_10_2619__4.pdf]
